# Supplementary material for: Mechanistic study of the bismuth mediated fluorination of arylboronic esters and further rational design
Source: Royal Society of Chemistry journal article supplement (doi:10.1039/d2ra04296g), 2022-01-01
Supplement: d2ra04296g1.pdf [file d2ra04296g1.pdf]

## SUPPLEMENTARY INFORMATION

### Mechanistic Study of the Bismuth Mediated Fluorination of Aarylboronic Esters and Further Rational Design

*Jiali Cai<sup>a</sup>, Minna Zhi<sup>a</sup>, Junyuan Hu<sup>a</sup>, Tingting Pu<sup>a</sup>, Kai Guo<sup>c</sup>, Lili Zhao<sup>a,b\*</sup>*

<sup>a</sup>Institute of Advanced Synthesis, School of Chemistry and Molecular Engineering, Jiangsu National Synergetic Innovation Center for Advanced Materials, Nanjing Tech University, Nanjing 211816, China.

<sup>b</sup>State Key Laboratory of Materials-Oriented Chemical Engineering, Nanjing Tech University, Nanjing 211816, China

<sup>c</sup>College of Biotechnology and Pharmaceutical Engineering, Nanjing Tech University, 30 Puzhu Rd S., Nanjing 211816,

Email: [ias\\_llzhao@njtech.edu.cn](mailto:ias_llzhao@njtech.edu.cn)

### Table of Contents

|                                                                                            | Page |
|--------------------------------------------------------------------------------------------|------|
| Free energy profiles of the aromatic ring attacking from above the Bi atom for the stage I | 2    |
| Isomers of <b>IM4A</b> for the stage II                                                    | 3    |
| Key optimized geometries of structure in Fig. 4                                            | 4    |
| Wiberg bond order(P) and Natural Charge(q) of Bi species for the stage III                 | 4    |
| Structures of several designed catalysts                                                   | 5    |
| Coordinates and energies of the calculated structures                                      | 6    |

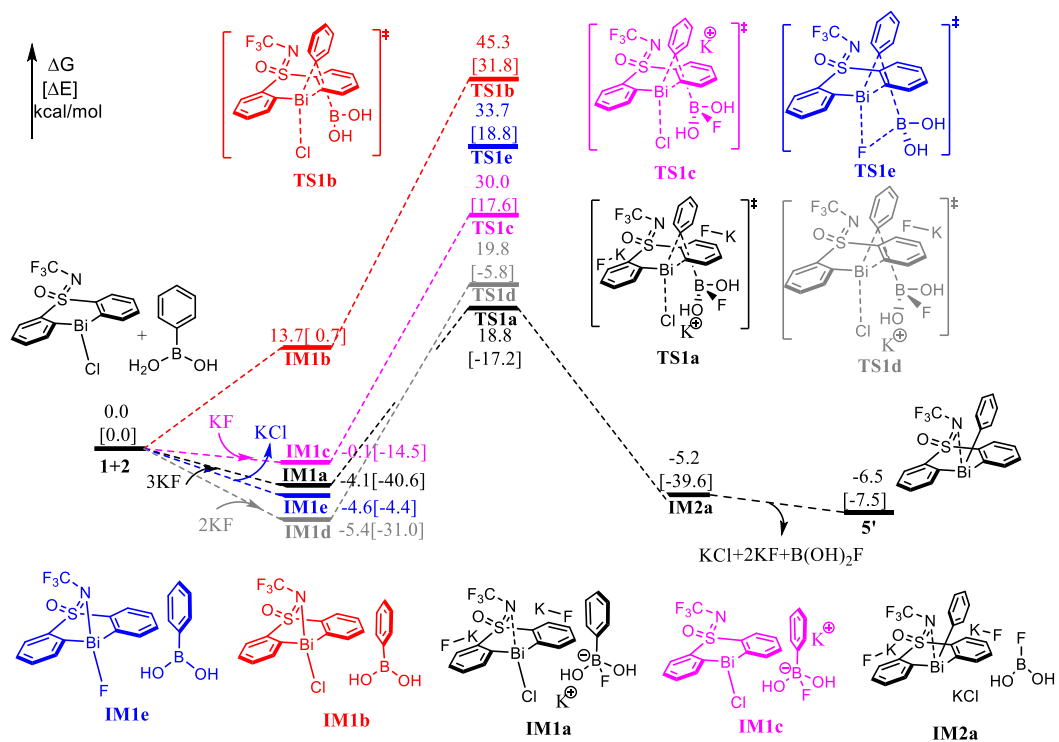

**Fig. S1** Computed free energy profiles (in kcal/mol) of the aromatic ring attacking from above the Bi atom for stage I. The electronic energies (in kcal/mol) are given in brackets for reference.

**Table S1.** Isomers of **IM4A** are evaluated at the BP86+D3/def2-TZVPP (smd, solvent= Chloroform) level. In parenthesis, relative energies given in kcal/mol.

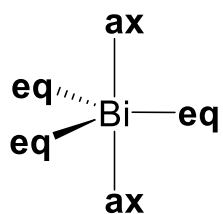

Pentavalent Bi<sup>V</sup> species

Trans isomers

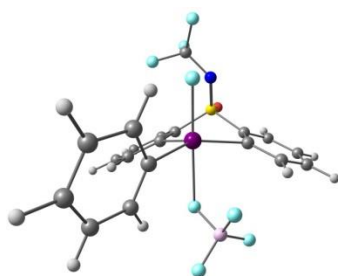

**IM4D (4.1)**

Cis isomers

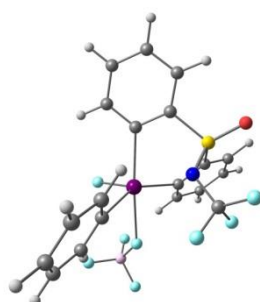

**IM4A (10.7)**

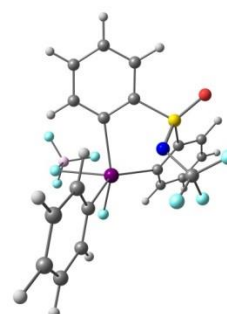

**IM4B (5.7)**

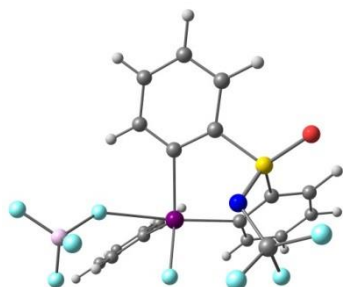

**IM4C (0.0)**

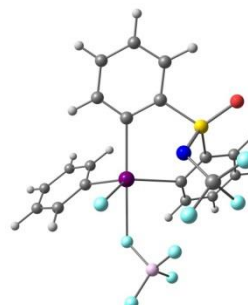

**IM4E (9.0)**

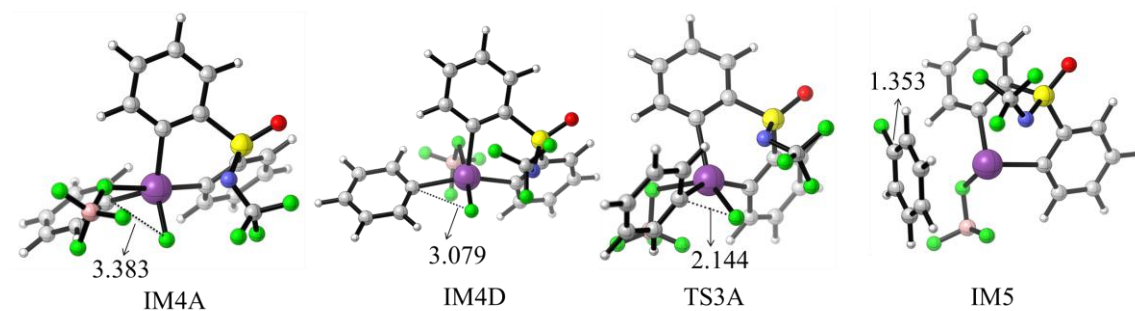

Fig. S2 Key optimized geometries according to the reaction pathway in Fig. 4. Key bond distances are given in Å. Color code, C: gray, H: white, F: green, K: blue, Bi: purple, S: yellow, O: red.

Table S2. Wiberg bond order(P) and Natural Charge(q) of Bi species calculated at the BP86+D3(BJ)/def2-TZVPP level with the NBO program.

|    | Bi species              |          |                             |          |       |
|----|-------------------------|----------|-----------------------------|----------|-------|
|    | Natural Charge <b>q</b> |          | Wiberg bond orders <b>P</b> |          |       |
|    | <b>TS3A</b>             | <b>7</b> | <b>TS3A</b>                 | <b>7</b> |       |
| Bi | 1.815                   | 1.553    | Bi-C1                       | 0.434    |       |
| C1 | 0.006                   |          | Bi-C2                       | 0.598    | 0.711 |
| C2 | -0.415                  | -0.389   | Bi-F1                       | 0.388    |       |
| F1 | -0.529                  |          | Bi-F2                       | 0.107    | 0.184 |
| F2 | -0.548                  | -0.542   | C1-F1                       | 0.231    |       |

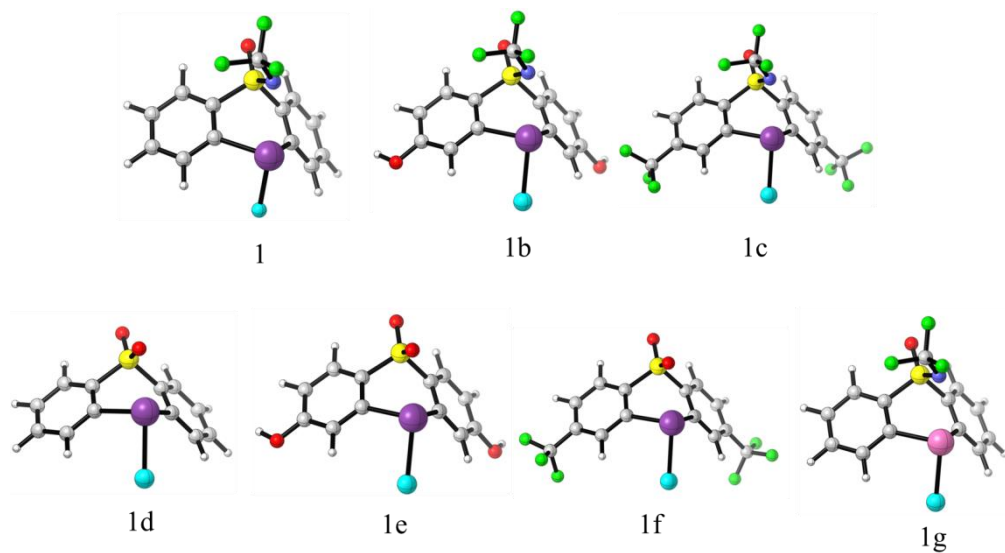

Fig. S3 Structures of several designed catalysts. color code, C: gray, H: white, F: green, Cl: indigo, O: red, S: yellow, N: blue and Sb: pink.

**Table S3.** Coordinates and energies (in hatree) of the calculated structures at the BP86+D3/def2-TZVPP (smd, solvent = Acetonitrile(TM)/ Chloroform (OA and RE))/BP86+D3/def2-SVP (smd, solvent = Acetonitrile(TM)/ Chloroform (OA and RE))

|                        |          |           |          |                        |          |          |           |
|------------------------|----------|-----------|----------|------------------------|----------|----------|-----------|
| <b>1</b>               |          |           |          | C                      | -2.66496 | 0.000018 | -0.000019 |
| Energy = -2003.4860329 |          |           |          | C                      | -1.95899 | -1.21764 | -0.01875  |
| Bi                     | -1.00200 | -0.80387  | -0.72411 | H                      | -0.00683 | -2.17004 | -0.03176  |
| Cl                     | -3.24046 | -1.2961   | 0.468976 | H                      | -0.00682 | 2.170028 | 0.031803  |
| S                      | 1.545911 | 1.157403  | 0.202196 | H                      | -2.50879 | 2.172732 | 0.034309  |
| F                      | 2.067177 | -1.24606  | -2.63056 | H                      | -3.7671  | 0.000016 | -0.000045 |
| F                      | 2.863496 | -1.4032   | -0.59639 | H                      | -2.50883 | -2.1727  | -0.03433  |
| F                      | 3.603035 | 0.148815  | -1.93468 | B                      | 1.7552   | 0.000009 | 0.000033  |
| O                      | 2.742819 | 1.98285   | 0.513825 | O                      | 2.396939 | -1.21695 | 0.038311  |
| N                      | 1.422437 | 0.348216  | -1.19536 | H                      | 3.373766 | -1.15143 | 0.030675  |
| C                      | -1.15003 | 1.450376  | -0.23477 | O                      | 2.396978 | 1.216945 | -0.03831  |
| C                      | 0.031015 | 2.120577  | 0.117344 | H                      | 3.373804 | 1.151379 | -0.03097  |
| C                      | 0.090792 | 3.473804  | 0.476929 |                        |          |          |           |
| H                      | 1.046576 | 3.943003  | 0.756128 | <b>5</b>               |          |          |           |
| C                      | -1.11387 | 4.198999  | 0.458849 | Energy = -1774.9193375 |          |          |           |
| H                      | -1.10862 | 5.267621  | 0.722826 | Bi                     | -0.61271 | -0.41716 | -1.0605   |
| C                      | -2.31865 | 3.560466  | 0.111101 | S                      | 2.199954 | 0.754584 | 0.603176  |
| H                      | -3.25846 | 4.135093  | 0.111034 | F                      | 2.929104 | -1.2908  | -2.4287   |
| C                      | -2.34181 | 2.192273  | -0.23007 | F                      | 4.541732 | -0.48736 | -1.18949  |
| H                      | -3.29755 | 1.701734  | -0.47549 | F                      | 3.119744 | -1.90213 | -0.33378  |
| C                      | 0.167979 | -0.94779  | 1.280034 | O                      | 3.359226 | 1.258369 | 1.394042  |
| C                      | 1.22018  | -0.04922  | 1.511215 | N                      | 2.365628 | 0.244005 | -0.89898  |
| C                      | 1.978954 | -0.01335  | 2.688547 | C                      | 0.198071 | -1.12364 | 0.98613   |
| H                      | 2.789304 | 0.720685  | 2.814157 | C                      | 1.335934 | -0.5287  | 1.553295  |
| C                      | 1.666496 | -0.95272  | 3.687175 | C                      | 1.846925 | -0.87155 | 2.813568  |
| H                      | 2.247669 | -0.96703  | 4.622046 | H                      | 2.741358 | -0.36304 | 3.203682  |
| C                      | 0.612003 | -1.86462  | 3.494072 | C                      | 1.187537 | -1.87716 | 3.539502  |
| H                      | 0.367424 | -2.58954  | 4.286663 | H                      | 1.568255 | -2.17629 | 4.528375  |
| C                      | -0.141   | -1.86021  | 2.301529 | C                      | 0.044566 | -2.49644 | 3.001922  |
| H                      | -0.98012 | -2.56386  | 2.178114 | H                      | -0.47304 | -3.28174 | 3.575598  |
| C                      | 2.46624  | -0.50983  | -1.56367 | C                      | -0.45189 | -2.11857 | 1.738855  |
|                        |          |           |          | H                      | -1.3619  | -2.60198 | 1.347516  |
| <b>2</b>               |          |           |          | C                      | -0.23176 | 1.728966 | -0.31012  |
| Energy = -408.4619375  |          |           |          | C                      | 0.958821 | 2.036835 | 0.367031  |
| C                      | -0.55368 | -1.21316  | -0.01757 | C                      | 1.240352 | 3.295988 | 0.917344  |
| C                      | 0.177508 | -0.000009 | 0.000027 | H                      | 2.188078 | 3.468487 | 1.449754  |
| C                      | -0.55366 | 1.213143  | 0.017589 | C                      | 0.283047 | 4.311444 | 0.756584  |
| C                      | -1.95898 | 1.217648  | 0.018742 | H                      | 0.47693  | 5.314087 | 1.167815  |

|                       |          |          |          |                        |          |          |          |
|-----------------------|----------|----------|----------|------------------------|----------|----------|----------|
| C                     | -0.91727 | 4.043169 | 0.074401 | C                      | 2.567741 | 2.174472 | -0.92577 |
| H                     | -1.66828 | 4.840399 | -0.04455 | H                      | 2.480777 | 3.120469 | -0.36484 |
| C                     | -1.17656 | 2.761539 | -0.44996 | C                      | -1.59227 | 1.440551 | 0.085459 |
| H                     | -2.13441 | 2.567307 | -0.9595  | C                      | -2.78138 | 1.044571 | 0.725189 |
| C                     | -2.74973 | -0.35903 | -0.21559 | H                      | -2.75757 | 0.599923 | 1.734266 |
| C                     | -3.03585 | 0.178998 | 1.057239 | C                      | -4.01635 | 1.191127 | 0.065975 |
| H                     | -2.22457 | 0.588281 | 1.68173  | H                      | -4.94427 | 0.864734 | 0.563205 |
| C                     | -4.35633 | 0.19753  | 1.540297 | C                      | -4.06436 | 1.744615 | -1.22512 |
| H                     | -4.57055 | 0.619764 | 2.535815 | H                      | -5.0308  | 1.855254 | -1.74233 |
| C                     | -5.4032  | -0.32152 | 0.755015 | C                      | -2.87565 | 2.147201 | -1.85975 |
| H                     | -6.43751 | -0.30622 | 1.134505 | H                      | -2.90819 | 2.57038  | -2.8769  |
| C                     | -5.12645 | -0.85916 | -0.51371 | C                      | -1.63942 | 1.995028 | -1.20702 |
| H                     | -5.94309 | -1.2668  | -1.13177 | H                      | -0.71171 | 2.289144 | -1.72428 |
| C                     | -3.8028  | -0.87727 | -0.99665 | C                      | -1.67894 | -1.77353 | -1.49255 |
| H                     | -3.60198 | -1.30374 | -1.995   |                        |          |          |          |
| C                     | 3.214525 | -0.8214  | -1.1843  |                        |          |          |          |
| <b>5'</b>             |          |          |          |                        |          |          |          |
| Energy = -1774.905813 |          |          |          |                        |          |          |          |
| Bi                    | 0.377322 | 1.320042 | 1.232784 | B(OH) <sub>2</sub> Cl  |          |          |          |
| S                     | 0.856492 | -1.55214 | -1.11541 | Energy = -637.0071191  |          |          |          |
| F                     | -2.70694 | -1.17952 | -2.14994 | B                      | -0.48575 | -7.8E-05 | -2.1E-05 |
| F                     | -1.59085 | -3.05606 | -1.99006 | O                      | -1.18226 | -1.16723 | -6.2E-05 |
| F                     | -2.10213 | -1.93854 | -0.18947 | H                      | -0.61133 | -1.9611  | 0.000195 |
| O                     | 1.506417 | -2.72445 | -1.77616 | O                      | -1.18035 | 1.16885  | 0.000115 |
| N                     | -0.53252 | -1.00733 | -1.64414 | H                      | -0.60528 | 1.959946 | -0.00065 |
| C                     | 0.398819 | -0.94512 | 1.608189 | Cl                     | 1.326251 | -0.00067 | 0.000008 |
| C                     | 0.74268  | -1.92616 | 0.661727 |                        |          |          |          |
| C                     | 0.873974 | -3.28641 | 0.988568 | <b>IM1A</b>            |          |          |          |
| H                     | 1.144572 | -4.01013 | 0.205483 | Energy = -4511.8734344 |          |          |          |
| C                     | 0.644357 | -3.68824 | 2.314146 | Bi                     | 0.69716  | 0.911194 | 0.000173 |
| H                     | 0.73727  | -4.75118 | 2.585734 | Cl                     | 1.814491 | 3.125617 | -0.96398 |
| C                     | 0.296673 | -2.73321 | 3.283788 | S                      | 2.328637 | -1.91596 | 0.644268 |
| H                     | 0.11328  | -3.04529 | 4.3242   | F                      | -0.85864 | -0.98786 | 2.27439  |
| C                     | 0.191727 | -1.37309 | 2.934623 | F                      | 0.94482  | -1.91888 | 3.094952 |
| H                     | -0.05756 | -0.63677 | 3.71766  | F                      | -0.50585 | -3.13212 | 2.010946 |
| C                     | 1.733243 | 1.08682  | -0.5978  | O                      | 2.873742 | -3.25977 | 0.97134  |
| C                     | 1.907022 | -0.0986  | -1.33363 | N                      | 0.726306 | -1.62601 | 0.783963 |
| C                     | 2.869421 | -0.23321 | -2.3481  | C                      | 1.895385 | -0.31735 | -1.54384 |
| H                     | 2.970345 | -1.1913  | -2.87969 | C                      | 2.508291 | -1.4973  | -1.09405 |
| C                     | 3.676178 | 0.871817 | -2.66391 | C                      | 3.246651 | -2.36753 | -1.91101 |
| H                     | 4.42858  | 0.786229 | -3.46306 | H                      | 3.710437 | -3.27718 | -1.49965 |
| C                     | 3.519602 | 2.07612  | -1.95843 | C                      | 3.349508 | -2.03134 | -3.27276 |
| H                     | 4.150811 | 2.944821 | -2.20392 | H                      | 3.90663  | -2.6929  | -3.95345 |
|                       |          |          |          | C                      | 2.741586 | -0.86025 | -3.76176 |
|                       |          |          |          | H                      | 2.827953 | -0.60926 | -4.83061 |
|                       |          |          |          | C                      | 2.020013 | -0.00369 | -2.9052  |
|                       |          |          |          | H                      | 1.556049 | 0.911704 | -3.30462 |





**IM2A**

Energy = -4511.8691711

|    |          |          |          |
|----|----------|----------|----------|
| Bi | -0.04534 | -0.55483 | -1.07788 |
| Cl | 0.275852 | 2.248885 | 2.967657 |
| S  | 2.455007 | -0.22248 | 1.416337 |
| F  | 1.852492 | -3.27833 | 0.281961 |
| F  | 3.555449 | -2.93064 | 1.600573 |
| F  | 3.84933  | -3.0551  | -0.57492 |
| O  | 3.412325 | 0.011308 | 2.531551 |
| N  | 2.874027 | -1.19291 | 0.19854  |
| C  | 1.333939 | 1.253888 | -0.65023 |
| C  | 2.219924 | 1.277426 | 0.436487 |
| C  | 3.065242 | 2.357307 | 0.738003 |
| H  | 3.724102 | 2.31871  | 1.617881 |
| C  | 3.04175  | 3.469018 | -0.1225  |
| H  | 3.703118 | 4.326041 | 0.076438 |
| C  | 2.182689 | 3.478566 | -1.2409  |
| H  | 2.176685 | 4.345075 | -1.92118 |
| C  | 1.322172 | 2.386844 | -1.49194 |
| H  | 0.642071 | 2.420712 | -2.3595  |
| C  | -0.16689 | -1.0624  | 1.161776 |
| C  | 0.881596 | -0.81748 | 2.058717 |
| C  | 0.812682 | -1.08978 | 3.433309 |
| H  | 1.669927 | -0.86475 | 4.083759 |
| C  | -0.37406 | -1.64195 | 3.937526 |
| H  | -0.45834 | -1.86753 | 5.011734 |
| C  | -1.45225 | -1.89918 | 3.070385 |
| H  | -2.38594 | -2.3312  | 3.46401  |
| C  | -1.34748 | -1.6103  | 1.697195 |
| H  | -2.20026 | -1.82441 | 1.035686 |
| C  | 3.021564 | -2.5594  | 0.39695  |
| C  | -2.49919 | 1.313131 | -2.04683 |
| C  | -1.84549 | 0.872497 | -0.87622 |
| C  | -2.26448 | 1.374861 | 0.377458 |
| C  | -3.32003 | 2.311866 | 0.453378 |
| C  | -3.96309 | 2.753989 | -0.72199 |
| C  | -3.55196 | 2.249149 | -1.97052 |
| H  | -2.19485 | 0.927017 | -3.03386 |
| H  | -1.74864 | 1.074441 | 1.306378 |
| H  | -3.6415  | 2.69435  | 1.437249 |
| H  | -4.78723 | 3.481925 | -0.66057 |
| H  | -4.05454 | 2.583487 | -2.89229 |
| B  | -3.31857 | -2.55936 | -1.4826  |
| O  | -2.16541 | -3.04425 | -2.01397 |

|   |          |          |          |
|---|----------|----------|----------|
| H | -1.74625 | -3.7622  | -1.49389 |
| O | -3.95446 | -2.92108 | -0.32117 |
| H | -3.5415  | -3.66113 | 0.172599 |
| F | -3.92457 | -1.54669 | -2.15027 |
| K | -0.50556 | 3.911471 | 0.817026 |
| F | 5.852337 | 1.249831 | -2.47815 |
| K | 4.054513 | -0.02273 | -2.02449 |
| K | -5.0014  | -0.40458 | 0.350562 |
| F | -6.98637 | 0.404416 | 1.032015 |

**IM1B**

Energy = -2411.9700448

|    |          |          |          |
|----|----------|----------|----------|
| Bi | 0.929685 | -1.64666 | 0.096804 |
| Cl | -0.98991 | -2.66613 | 1.577725 |
| S  | 1.230814 | 1.502168 | -0.92591 |
| F  | 4.203214 | -0.77603 | -1.2762  |
| F  | 3.95082  | 0.837638 | 0.180786 |
| F  | 4.177548 | 1.312274 | -1.93306 |
| O  | 1.483888 | 2.873058 | -1.44147 |
| N  | 2.219563 | 0.263714 | -1.29947 |
| C  | -0.56687 | -0.54824 | -1.26079 |
| C  | -0.30315 | 0.798873 | -1.5476  |
| C  | -1.11423 | 1.600788 | -2.36042 |
| H  | -0.86506 | 2.65671  | -2.54351 |
| C  | -2.23815 | 0.992054 | -2.94656 |
| H  | -2.89782 | 1.586186 | -3.59679 |
| C  | -2.51181 | -0.3667  | -2.71274 |
| H  | -3.39041 | -0.8333  | -3.1833  |
| C  | -1.688   | -1.13588 | -1.86581 |
| H  | -1.93266 | -2.19181 | -1.67673 |
| C  | 0.991364 | 0.223012 | 1.467068 |
| C  | 1.140427 | 1.484538 | 0.874337 |
| C  | 1.276911 | 2.681252 | 1.588725 |
| H  | 1.388779 | 3.641646 | 1.063722 |
| C  | 1.277354 | 2.595703 | 2.991999 |
| H  | 1.398031 | 3.509697 | 3.593331 |
| C  | 1.114952 | 1.348123 | 3.624079 |
| H  | 1.106827 | 1.292754 | 4.724079 |
| C  | 0.959096 | 0.166388 | 2.869626 |
| H  | 0.815844 | -0.79803 | 3.382684 |
| C  | 3.595324 | 0.420077 | -1.0803  |
| C  | -3.96695 | 1.833514 | -0.23052 |
| C  | -3.59533 | 0.622336 | 0.403411 |
| C  | -2.6114  | 0.686162 | 1.418032 |

|   |          |          |          |
|---|----------|----------|----------|
| C | -2.03112 | 1.908257 | 1.793216 |
| C | -2.40257 | 3.096269 | 1.139588 |
| C | -3.37373 | 3.056983 | 0.122035 |
| H | -4.72911 | 1.807984 | -1.02552 |
| H | -2.2815  | -0.23555 | 1.925084 |
| H | -1.28178 | 1.933465 | 2.596698 |
| H | -1.93441 | 4.052328 | 1.424573 |
| H | -3.66747 | 3.983604 | -0.39739 |
| B | -4.27056 | -0.73786 | -0.02498 |
| O | -3.82585 | -1.98423 | 0.33519  |
| H | -2.93924 | -2.01669 | 0.770618 |
| O | -5.40492 | -0.6605  | -0.80688 |
| H | -5.72458 | -1.5563  | -1.04059 |

**TS1B**

Energy = -2411.9036442

|    |          |          |          |
|----|----------|----------|----------|
| Bi | 0.382987 | -0.37637 | 0.672282 |
| Cl | 2.145384 | -2.85701 | -0.53056 |
| S  | -2.73127 | 0.704379 | -0.10047 |
| F  | -2.37761 | -2.15079 | 2.296171 |
| F  | -3.07529 | -2.23144 | 0.221408 |
| F  | -4.32343 | -1.31118 | 1.752343 |
| O  | -4.13615 | 1.107264 | -0.38581 |
| N  | -2.37332 | -0.20826 | 1.180041 |
| C  | -0.31292 | 1.857011 | 0.520129 |
| C  | -1.65969 | 2.107699 | 0.209127 |
| C  | -2.22311 | 3.383901 | 0.067408 |
| H  | -3.28657 | 3.50262  | -0.19052 |
| C  | -1.38206 | 4.49032  | 0.274517 |
| H  | -1.78699 | 5.509672 | 0.180775 |
| C  | -0.02922 | 4.28744  | 0.60062  |
| H  | 0.630356 | 5.155437 | 0.759385 |
| C  | 0.500243 | 2.986356 | 0.721788 |
| H  | 1.565312 | 2.860512 | 0.966134 |
| C  | -0.69439 | -0.62378 | -1.40154 |
| C  | -1.99211 | -0.10173 | -1.54139 |
| C  | -2.75647 | -0.18138 | -2.71375 |
| H  | -3.7691  | 0.248269 | -2.74866 |
| C  | -2.18977 | -0.83565 | -3.82049 |
| H  | -2.76202 | -0.92273 | -4.75695 |
| C  | -0.89981 | -1.3852  | -3.71924 |
| H  | -0.45797 | -1.90728 | -4.58282 |
| C  | -0.16013 | -1.2835  | -2.52299 |
| H  | 0.83741  | -1.74489 | -2.46572 |

|   |          |          |          |
|---|----------|----------|----------|
| C | -3.02473 | -1.4332  | 1.341081 |
| C | 3.274991 | 1.075831 | 0.835676 |
| C | 2.632422 | 0.20714  | -0.0965  |
| C | 2.692227 | 0.566648 | -1.47219 |
| C | 3.396035 | 1.700606 | -1.90111 |
| C | 4.067953 | 2.506693 | -0.96075 |
| C | 4.012578 | 2.190764 | 0.410246 |
| H | 3.226771 | 0.833839 | 1.910609 |
| H | 2.197531 | -0.06913 | -2.2231  |
| H | 3.431229 | 1.957752 | -2.97186 |
| H | 4.633228 | 3.390038 | -1.29879 |
| H | 4.533164 | 2.825375 | 1.145118 |
| B | 3.248492 | -1.62113 | 0.418895 |
| O | 4.547653 | -1.66902 | -0.09596 |
| H | 5.162299 | -1.24999 | 0.540031 |
| O | 3.027453 | -1.64518 | 1.819106 |
| H | 2.620098 | -2.48808 | 2.097308 |

**IM1C**

Energy = -3111.9484495

|    |          |          |          |
|----|----------|----------|----------|
| Bi | 0.117333 | 0.653429 | -0.92827 |
| Cl | 0.731194 | 3.15427  | -1.24667 |
| S  | -2.30079 | -0.54336 | 1.298854 |
| F  | -1.13857 | -3.30473 | -0.99869 |
| F  | -2.75938 | -1.9119  | -1.46661 |
| F  | -2.98135 | -3.31328 | 0.186053 |
| O  | -3.32636 | -1.02381 | 2.265089 |
| N  | -1.43835 | -1.59812 | 0.434531 |
| C  | 0.041947 | 0.946446 | 1.359419 |
| C  | -0.9769  | 0.355949 | 2.123797 |
| C  | -1.07212 | 0.467542 | 3.51921  |
| H  | -1.90101 | -0.01044 | 4.06283  |
| C  | -0.07694 | 1.202372 | 4.185934 |
| H  | -0.11385 | 1.298313 | 5.281862 |
| C  | 0.951663 | 1.820853 | 3.451896 |
| H  | 1.722062 | 2.407787 | 3.976488 |
| C  | 1.008643 | 1.699226 | 2.048661 |
| H  | 1.810979 | 2.200801 | 1.486455 |
| C  | -2.1793  | 1.194335 | -0.83111 |
| C  | -3.02499 | 0.6415   | 0.142764 |
| C  | -4.38333 | 0.960878 | 0.289785 |
| H  | -4.9875  | 0.494789 | 1.082705 |
| C  | -4.93238 | 1.888381 | -0.61195 |
| H  | -5.99705 | 2.158404 | -0.53615 |

|                        |          |          |          |                        |          |          |          |
|------------------------|----------|----------|----------|------------------------|----------|----------|----------|
| C                      | -4.11941 | 2.471425 | -1.60182 | C                      | -1.94153 | 1.442268 | -0.87685 |
| H                      | -4.55298 | 3.205226 | -2.30016 | C                      | -3.01494 | 1.052651 | -0.06805 |
| C                      | -2.75455 | 2.133791 | -1.70634 | C                      | -4.28392 | 1.650242 | -0.02655 |
| H                      | -2.13196 | 2.624628 | -2.47264 | H                      | -5.07079 | 1.279926 | 0.648536 |
| C                      | -2.08522 | -2.48435 | -0.42069 | C                      | -4.49778 | 2.735849 | -0.89315 |
| C                      | 4.051412 | 0.551326 | 1.149349 | H                      | -5.47786 | 3.237659 | -0.91034 |
| C                      | 3.363289 | -0.30443 | 0.25839  | C                      | -3.45584 | 3.178004 | -1.73275 |
| C                      | 3.4212   | 0.029407 | -1.11901 | H                      | -3.62978 | 4.034439 | -2.40502 |
| C                      | 4.106636 | 1.168219 | -1.58244 | C                      | -2.1959  | 2.543033 | -1.72021 |
| C                      | 4.76737  | 2.008828 | -0.6683  | H                      | -1.39608 | 2.925724 | -2.37801 |
| C                      | 4.74469  | 1.691772 | 0.702679 | C                      | -2.65792 | -2.19787 | -0.72009 |
| H                      | 4.023527 | 0.3228   | 2.228609 | C                      | 3.208304 | -0.71894 | 1.229643 |
| H                      | 2.910663 | -0.61356 | -1.85796 | C                      | 2.568524 | -0.85086 | -0.03071 |
| H                      | 4.117135 | 1.407189 | -2.65859 | C                      | 3.414224 | -0.81993 | -1.17133 |
| H                      | 5.297504 | 2.907711 | -1.02283 | C                      | 4.816494 | -0.68636 | -1.07233 |
| H                      | 5.262193 | 2.343358 | 1.426441 | C                      | 5.418772 | -0.56445 | 0.199531 |
| B                      | 2.485621 | -1.5687  | 0.80187  | C                      | 4.607329 | -0.57988 | 1.355983 |
| O                      | 2.198915 | -1.57319 | 2.215915 | H                      | 2.599436 | -0.76575 | 2.149929 |
| H                      | 1.878532 | -0.69183 | 2.484523 | H                      | 2.967979 | -0.92485 | -2.17946 |
| O                      | 1.232212 | -1.64883 | -0.03202 | H                      | 5.444819 | -0.68299 | -1.97969 |
| H                      | 0.441251 | -1.81796 | 0.536728 | H                      | 6.513221 | -0.46646 | 0.289256 |
| F                      | 3.205821 | -2.83656 | 0.516121 | H                      | 5.072738 | -0.49298 | 2.352892 |
| K                      | 1.664074 | -3.8298  | -1.3251  | B                      | 1.343791 | -2.80781 | 0.054448 |
| <b>TS1C</b>            |          |          |          | O                      | 0.500471 | -2.68248 | 1.14473  |
| Energy = -3111.8933397 |          |          |          | H                      | -0.39142 | -2.31805 | 0.91409  |
| Bi                     | 0.214693 | 0.169956 | -0.76231 | O                      | 0.912781 | -2.86513 | -1.27861 |
| Cl                     | 1.388953 | 2.516917 | -1.12222 | H                      | -0.05793 | -2.91543 | -1.36644 |
| S                      | -2.67459 | -0.32465 | 1.057178 | F                      | 2.509813 | -3.50024 | 0.307381 |
| F                      | -1.8747  | -2.5974  | -1.78066 | K                      | 4.216311 | 2.355222 | -0.22511 |
| F                      | -3.72162 | -1.54009 | -1.26542 | <b>TS1D</b>            |          |          |          |
| F                      | -3.16006 | -3.34232 | -0.18004 | Energy = -3811.8639432 |          |          |          |
| O                      | -3.8731  | -0.72382 | 1.845861 | Bi                     | -0.21258 | 0.955816 | -0.50344 |
| N                      | -1.88223 | -1.45533 | 0.178695 | Cl                     | 0.647521 | 3.101808 | 0.771918 |
| C                      | -0.12294 | 0.622427 | 1.487555 | S                      | -2.66385 | -1.18211 | 0.543583 |
| C                      | -1.34259 | 0.278523 | 2.091679 | F                      | -1.84341 | -0.90034 | -3.12515 |
| C                      | -1.65274 | 0.50373  | 3.441689 | F                      | -3.70149 | -0.38811 | -2.08582 |
| H                      | -2.63387 | 0.213977 | 3.847586 | F                      | -3.14906 | -2.47575 | -2.3491  |
| C                      | -0.67178 | 1.113171 | 4.24142  | O                      | -3.66903 | -2.23659 | 0.845967 |
| H                      | -0.87299 | 1.295901 | 5.308075 | N                      | -1.8676  | -1.21755 | -0.89395 |
| C                      | 0.553741 | 1.501215 | 3.670308 | C                      | -0.21889 | -0.29867 | 1.434196 |
| H                      | 1.313258 | 2.000849 | 4.292366 | C                      | -1.25864 | -1.22053 | 1.651291 |
| C                      | 0.823282 | 1.258842 | 2.308891 | C                      | -1.29201 | -2.13774 | 2.711765 |
| H                      | 1.788823 | 1.57732  | 1.889741 | H                      | -2.13738 | -2.83279 | 2.828832 |

|                        |          |          |          |   |          |          |          |
|------------------------|----------|----------|----------|---|----------|----------|----------|
| C                      | -0.19782 | -2.14473 | 3.597682 | F | -3.74038 | -1.03169 | -1.77726 |
| H                      | -0.17013 | -2.87645 | 4.41999  | F | -3.1016  | -3.0992  | -1.52802 |
| C                      | 0.852642 | -1.22316 | 3.429266 | O | -3.27262 | -2.37222 | 1.463401 |
| H                      | 1.745989 | -1.26192 | 4.067632 | N | -1.76507 | -1.46083 | -0.59464 |
| C                      | 0.825042 | -0.29326 | 2.368987 | C | 0.005928 | -0.0962  | 1.314368 |
| H                      | 1.662982 | 0.408522 | 2.255325 | C | -0.90756 | -1.03567 | 1.815038 |
| C                      | -2.46861 | 1.524042 | 0.33841  | C | -0.64972 | -1.89226 | 2.896657 |
| C                      | -3.33917 | 0.487501 | 0.697115 | H | -1.40896 | -2.61242 | 3.238041 |
| C                      | -4.6419  | 0.638202 | 1.196085 | C | 0.626767 | -1.82857 | 3.480975 |
| H                      | -5.25952 | -0.23391 | 1.460512 | H | 0.883071 | -2.52107 | 4.297986 |
| C                      | -5.11673 | 1.95387  | 1.333504 | C | 1.586462 | -0.92075 | 2.991648 |
| H                      | -6.13599 | 2.130383 | 1.710875 | H | 2.637844 | -0.98918 | 3.313798 |
| C                      | -4.28593 | 3.039026 | 0.990961 | C | 1.256465 | -0.03999 | 1.94431  |
| H                      | -4.66434 | 4.067867 | 1.107511 | H | 2.046601 | 0.60036  | 1.527039 |
| C                      | -2.97813 | 2.826577 | 0.505948 | C | -2.59749 | 1.344009 | 0.238922 |
| H                      | -2.3464  | 3.698358 | 0.263158 | C | -3.27357 | 0.293287 | 0.876557 |
| C                      | -2.6435  | -1.24673 | -2.06168 | C | -4.51645 | 0.41353  | 1.513928 |
| C                      | 3.365332 | -0.17974 | 0.139972 | H | -4.98896 | -0.45228 | 2.001955 |
| C                      | 2.387727 | 0.125587 | -0.85101 | C | -5.12882 | 1.678431 | 1.491031 |
| C                      | 2.847211 | 0.908461 | -1.94549 | H | -6.11144 | 1.817051 | 1.967747 |
| C                      | 4.187326 | 1.329659 | -2.08549 | C | -4.48535 | 2.761855 | 0.863198 |
| C                      | 5.139663 | 0.96276  | -1.11043 | H | -4.97001 | 3.751213 | 0.855189 |
| C                      | 4.71995  | 0.204248 | 0.003171 | C | -3.22701 | 2.600892 | 0.2476   |
| H                      | 3.140878 | -0.77067 | 1.05487  | H | -2.73226 | 3.468747 | -0.21775 |
| H                      | 2.133936 | 1.178027 | -2.74881 | C | -2.63118 | -1.82538 | -1.63928 |
| H                      | 4.496548 | 1.92995  | -2.95838 | C | 3.751877 | -0.12138 | -0.13452 |
| H                      | 6.194881 | 1.263342 | -1.21861 | C | 2.804291 | -0.15318 | -1.19608 |
| H                      | 5.446494 | -0.09662 | 0.778618 | C | 2.7599   | 0.988105 | -2.03906 |
| B                      | 1.461767 | -1.84306 | -1.77234 | C | 3.616857 | 2.094302 | -1.86887 |
| O                      | 0.629846 | -2.41796 | -0.8157  | C | 4.577479 | 2.081365 | -0.83927 |
| H                      | -0.31677 | -2.10894 | -0.85632 | C | 4.631582 | 0.969105 | 0.030717 |
| O                      | 1.043409 | -1.34423 | -2.99484 | H | 3.827295 | -0.94112 | 0.617003 |
| H                      | 0.075846 | -1.22683 | -3.05251 | H | 2.036394 | 0.992897 | -2.87123 |
| F                      | 2.730606 | -2.40787 | -1.77124 | H | 3.549143 | 2.958356 | -2.5507  |
| K                      | 3.605348 | 2.880587 | 0.94631  | H | 5.285963 | 2.920448 | -0.72408 |
| F                      | 3.493768 | -2.04463 | 2.595885 | H | 5.373974 | 0.945172 | 0.848475 |
| K                      | 2.397091 | -3.31593 | 0.961175 | B | 1.865203 | -1.46363 | -1.55397 |
|                        |          |          |          | O | 1.167184 | -2.09179 | -0.41555 |
|                        |          |          |          | H | 0.194362 | -2.04096 | -0.5273  |
|                        |          |          |          | O | 0.925394 | -1.05242 | -2.59796 |
|                        |          |          |          | H | 0.301556 | -1.77931 | -2.78698 |
|                        |          |          |          | F | 2.800218 | -2.51523 | -2.03479 |
|                        |          |          |          | K | 2.889469 | 3.289604 | 1.464198 |
|                        |          |          |          | F | 4.078646 | -2.13663 | 2.124476 |
| <b>IMID</b>            |          |          |          |   |          |          |          |
| Energy = -3811.8394326 |          |          |          |   |          |          |          |
| Bi                     | -0.49532 | 0.919753 | -0.71413 |   |          |          |          |
| Cl                     | 0.237893 | 3.336045 | 0.1415   |   |          |          |          |
| S                      | -2.42092 | -1.29325 | 0.898517 |   |          |          |          |
| F                      | -1.95631 | -1.75404 | -2.81665 |   |          |          |          |

|                        |          |          |          |                        |          |          |          |
|------------------------|----------|----------|----------|------------------------|----------|----------|----------|
| K                      | 2.922077 | -3.59701 | 0.65148  | O                      | -2.76405 | 0.368785 | 2.733956 |
|                        |          |          |          | H                      | -3.67006 | 0.030802 | 2.86214  |
| <b>TS1F</b>            |          |          |          | O                      | -3.71224 | 2.084256 | 1.22293  |
| Energy = -5211.7987588 |          |          |          | H                      | -4.58126 | 1.642543 | 1.185955 |
| Bi                     | -0.46041 | -0.53045 | -0.55473 | F                      | -1.43153 | 1.796455 | 1.480973 |
| S                      | 2.681344 | 0.491653 | -0.12057 |                        |          |          |          |
| F                      | 2.08101  | -2.73555 | -1.94186 | <b>IM3A</b>            |          |          |          |
| F                      | 2.848932 | -2.49179 | 0.094009 | Energy = -3467.0853791 |          |          |          |
| F                      | 4.075025 | -1.89749 | -1.60603 | C                      | 2.388561 | -0.92402 | 2.224202 |
| O                      | 4.119031 | 0.853277 | 0.001402 | C                      | 1.186107 | -1.5689  | 2.515785 |
| N                      | 2.189263 | -0.63303 | -1.17789 | C                      | 0.781136 | -2.65628 | 1.724641 |
| C                      | 0.30152  | 1.627685 | -0.92043 | C                      | 1.568722 | -3.09078 | 0.649735 |
| C                      | 1.663447 | 1.863917 | -0.67588 | C                      | 2.788483 | -2.4603  | 0.384528 |
| C                      | 2.289002 | 3.110895 | -0.8176  | H                      | 0.569611 | -1.18476 | 3.338934 |
| H                      | 3.361652 | 3.229777 | -0.60121 | H                      | -0.18037 | -3.14654 | 1.926354 |
| C                      | 1.497048 | 4.185327 | -1.25596 | H                      | 1.250341 | -3.91352 | -0.00384 |
| H                      | 1.951528 | 5.179077 | -1.38862 | N                      | 3.152688 | -1.42028 | 1.199128 |
| C                      | 0.131058 | 3.985753 | -1.52772 | F                      | 4.342235 | -0.83469 | 0.97296  |
| H                      | -0.48563 | 4.831439 | -1.87106 | Cl                     | 3.857084 | -2.91976 | -0.84667 |
| C                      | -0.46506 | 2.719803 | -1.3606  | Cl                     | 2.970292 | 0.448229 | 3.049158 |
| H                      | -1.5389  | 2.599901 | -1.56703 | B                      | 2.74887  | 0.426094 | -2.42174 |
| C                      | 0.660593 | -0.43863 | 1.482928 | F                      | 1.360335 | 0.645095 | -2.69849 |
| C                      | 1.990921 | 0.00933  | 1.477718 | F                      | 3.19783  | -0.68978 | -3.1328  |
| C                      | 2.798047 | 0.101708 | 2.620095 | F                      | 3.483188 | 1.571511 | -2.7382  |
| H                      | 3.833854 | 0.466494 | 2.548223 | F                      | 2.876796 | 0.167861 | -1.00759 |
| C                      | 2.235097 | -0.30122 | 3.842909 | Bi                     | -0.00389 | 0.393652 | -0.25482 |
| H                      | 2.838859 | -0.2565  | 4.76247  | S                      | -3.09073 | -1.07247 | 0.521935 |
| C                      | 0.904218 | -0.75637 | 3.887491 | F                      | -1.33461 | -4.15198 | -0.4199  |
| H                      | 0.465541 | -1.05979 | 4.851562 | F                      | -3.0165  | -3.14292 | -1.40667 |
| C                      | 0.115999 | -0.8216  | 2.720292 | F                      | -0.96566 | -2.46954 | -1.75571 |
| H                      | -0.94025 | -1.1191  | 2.792185 | O                      | -4.45394 | -1.59056 | 0.833289 |
| C                      | 2.789763 | -1.89701 | -1.14448 | N                      | -1.86825 | -2.08882 | 0.335452 |
| C                      | -3.28852 | -1.45189 | 0.504159 | C                      | -2.00553 | 0.656618 | -1.36615 |
| C                      | -2.86814 | -0.1534  | 0.085562 | C                      | -3.17677 | 0.018487 | -0.92431 |
| C                      | -3.43764 | 0.328536 | -1.13361 | C                      | -4.42095 | 0.144997 | -1.56269 |
| C                      | -4.3734  | -0.41589 | -1.86738 | H                      | -5.30159 | -0.38228 | -1.16621 |
| C                      | -4.76841 | -1.69004 | -1.41211 | C                      | -4.49161 | 0.950836 | -2.71037 |
| C                      | -4.22537 | -2.20682 | -0.22042 | H                      | -5.45127 | 1.066347 | -3.23769 |
| H                      | -2.87163 | -1.87033 | 1.435986 | C                      | -3.33789 | 1.603174 | -3.18355 |
| H                      | -3.14986 | 1.325891 | -1.50447 | H                      | -3.39678 | 2.23323  | -4.0854  |
| H                      | -4.79923 | -0.00709 | -2.79804 | C                      | -2.10552 | 1.460444 | -2.51737 |
| H                      | -5.50073 | -2.27934 | -1.98715 | H                      | -1.21302 | 1.979635 | -2.90158 |
| H                      | -4.53474 | -3.20101 | 0.140892 | C                      | -1.2465  | 0.611211 | 1.71449  |
| B                      | -2.67915 | 1.156726 | 1.546945 | C                      | -2.46997 | -0.05578 | 1.872071 |

|   |          |          |          |
|---|----------|----------|----------|
| C | -3.28254 | 0.033909 | 3.013919 |
| H | -4.2424  | -0.50285 | 3.058462 |
| C | -2.82195 | 0.822057 | 4.081395 |
| H | -3.42656 | 0.908063 | 4.997545 |
| C | -1.59622 | 1.50593  | 3.97039  |
| H | -1.24518 | 2.134948 | 4.804412 |
| C | -0.82301 | 1.408343 | 2.797247 |
| H | 0.11858  | 1.976975 | 2.722722 |
| C | 0.398832 | 2.645887 | -0.15569 |
| C | 1.737737 | 3.087273 | -0.14986 |
| H | 2.559155 | 2.360792 | -0.2526  |
| C | 2.030113 | 4.459494 | -0.02505 |
| H | 3.079634 | 4.796736 | -0.02618 |
| C | 0.987975 | 5.395973 | 0.088961 |
| H | 1.21731  | 6.469901 | 0.181478 |
| C | -0.35015 | 4.959023 | 0.080573 |
| H | -1.1705  | 5.690457 | 0.16791  |
| C | -0.64351 | 3.58842  | -0.03849 |
| H | -1.69497 | 3.256814 | -0.03751 |
| C | -1.82216 | -2.91999 | -0.77652 |

#### TS2A

Energy = -3467.0628954

|    |          |          |          |
|----|----------|----------|----------|
| C  | 1.984483 | -2.48718 | -1.24458 |
| C  | 2.87177  | -3.36908 | -0.61945 |
| C  | 2.377214 | -4.2774  | 0.327106 |
| C  | 1.009653 | -4.29435 | 0.638621 |
| C  | 0.157201 | -3.39452 | -0.00762 |
| H  | 3.936353 | -3.32105 | -0.88565 |
| H  | 3.061249 | -4.98374 | 0.819477 |
| H  | 0.584385 | -4.98415 | 1.380696 |
| N  | 0.679101 | -2.47106 | -0.86263 |
| F  | -0.32097 | -2.14534 | -2.10679 |
| Cl | -1.51424 | -3.27229 | 0.321276 |
| Cl | 2.490005 | -1.38498 | -2.45296 |
| B  | -3.37938 | -0.75894 | 1.94862  |
| F  | -1.93513 | -0.63562 | 1.93667  |
| F  | -3.76015 | -1.30462 | 3.178722 |
| F  | -3.9269  | 0.530829 | 1.779851 |
| F  | -3.76018 | -1.5985  | 0.884993 |
| Bi | -0.45504 | 0.105837 | -0.19333 |
| S  | 2.525469 | 1.591108 | 0.525553 |
| F  | 3.648264 | -1.46938 | 1.838308 |
| F  | 2.678346 | 0.156729 | 2.929989 |

|   |          |          |          |
|---|----------|----------|----------|
| F | 1.48279  | -1.47698 | 2.087115 |
| O | 3.803641 | 2.276483 | 0.860982 |
| N | 2.394365 | -0.00331 | 0.6107   |
| C | -0.11785 | 1.765094 | 1.356166 |
| C | 1.168208 | 2.313981 | 1.489302 |
| C | 1.455985 | 3.37697  | 2.356699 |
| H | 2.481502 | 3.769157 | 2.429221 |
| C | 0.402441 | 3.900592 | 3.126185 |
| H | 0.599186 | 4.729678 | 3.823406 |
| C | -0.89054 | 3.357705 | 3.019399 |
| H | -1.70895 | 3.764439 | 3.6342   |
| C | -1.15664 | 2.284476 | 2.144508 |
| H | -2.16481 | 1.844286 | 2.08912  |
| C | 0.842399 | 1.340404 | -1.64824 |
| C | 2.059957 | 1.864063 | -1.18691 |
| C | 2.936747 | 2.616939 | -1.98013 |
| H | 3.873203 | 3.011293 | -1.5573  |
| C | 2.572996 | 2.840089 | -3.31982 |
| H | 3.243003 | 3.416136 | -3.97648 |
| C | 1.357505 | 2.333586 | -3.81537 |
| H | 1.076772 | 2.518992 | -4.86439 |
| C | 0.493969 | 1.591001 | -2.98548 |
| H | -0.45384 | 1.199651 | -3.39002 |
| C | -2.41369 | 0.669297 | -1.22909 |
| C | -2.98975 | -0.27968 | -2.08158 |
| H | -2.54338 | -1.28128 | -2.20184 |
| C | -4.15295 | 0.066116 | -2.7968  |
| H | -4.61622 | -0.6699  | -3.47319 |
| C | -4.72279 | 1.340937 | -2.63538 |
| H | -5.63896 | 1.605855 | -3.18687 |
| C | -4.13539 | 2.276083 | -1.7647  |
| H | -4.58302 | 3.275027 | -1.63737 |
| C | -2.97306 | 1.942612 | -1.04348 |
| H | -2.51801 | 2.676232 | -0.36065 |
| C | 2.552656 | -0.65271 | 1.835095 |

#### TS2E

Energy = -3467.0565978

|   |          |          |          |
|---|----------|----------|----------|
| C | 1.984483 | -2.48718 | -1.24458 |
| C | 2.87177  | -3.36908 | -0.61945 |
| C | 2.377214 | -4.2774  | 0.327106 |
| C | 1.009653 | -4.29435 | 0.638621 |
| C | 0.157201 | -3.39452 | -0.00762 |
| H | 3.936353 | -3.32105 | -0.88565 |



|   |          |          |          |   |          |          |          |
|---|----------|----------|----------|---|----------|----------|----------|
| C | 2.588741 | -1.0367  | 1.453068 | F | -4.94314 | -1.50835 | 0.782447 |
| C | 3.481261 | -1.40155 | 2.473499 | F | -3.6509  | -2.78479 | -0.43833 |
| H | 4.477341 | -1.78907 | 2.211677 | O | -4.68065 | 1.534706 | 0.235988 |
| C | 3.07666  | -1.24604 | 3.809247 | N | -3.21363 | -0.58814 | -0.47838 |
| H | 3.763058 | -1.52381 | 4.624024 | C | -1.06415 | 1.510311 | -1.47102 |
| C | 1.801156 | -0.73342 | 4.096512 | C | -2.41573 | 1.793673 | -1.2035  |
| H | 1.481733 | -0.60362 | 5.142712 | C | -3.15951 | 2.738487 | -1.92729 |
| C | 0.917414 | -0.39303 | 3.053184 | H | -4.21264 | 2.920231 | -1.6643  |
| H | -0.08765 | -0.01825 | 3.30356  | C | -2.53308 | 3.4173   | -2.98531 |
| C | 0.449258 | 1.983864 | -0.54554 | H | -3.09984 | 4.15803  | -3.5702  |
| C | 0.733542 | 2.865489 | 0.508973 | C | -1.19017 | 3.144094 | -3.29115 |
| H | 0.715861 | 2.525537 | 1.556894 | H | -0.69621 | 3.670578 | -4.12306 |
| C | 1.062323 | 4.200694 | 0.211118 | C | -0.46023 | 2.209177 | -2.53054 |
| H | 1.303093 | 4.898031 | 1.029671 | H | 0.600364 | 2.033988 | -2.76998 |
| C | 1.085657 | 4.638718 | -1.1245  | C | -1.09204 | 0.661462 | 1.735429 |
| H | 1.339398 | 5.685743 | -1.35476 | C | -2.43293 | 1.070151 | 1.616169 |
| C | 0.785396 | 3.744176 | -2.16755 | C | -3.18231 | 1.521565 | 2.714237 |
| H | 0.807335 | 4.086281 | -3.2148  | H | -4.23156 | 1.818636 | 2.566402 |
| C | 0.454046 | 2.407043 | -1.88289 | C | -2.56855 | 1.568575 | 3.976443 |
| H | 0.205654 | 1.712255 | -2.69823 | H | -3.14261 | 1.915523 | 4.849545 |
| C | 3.901382 | 1.38908  | -0.37649 | C | -1.22901 | 1.172961 | 4.115779 |

### TS2B

Energy = -3467.0582716

|    |          |          |          |
|----|----------|----------|----------|
| C  | 3.501045 | 1.698376 | -0.4306  |
| C  | 4.744801 | 1.715163 | 0.198662 |
| C  | 5.503748 | 0.536418 | 0.229747 |
| C  | 5.003593 | -0.64269 | -0.34394 |
| C  | 3.757204 | -0.61906 | -0.9665  |
| H  | 5.086841 | 2.643701 | 0.675891 |
| H  | 6.489002 | 0.531733 | 0.717242 |
| H  | 5.553992 | -1.59189 | -0.30044 |
| N  | 3.021326 | 0.531337 | -0.94822 |
| F  | 2.232871 | 0.729175 | -2.27433 |
| Cl | 3.040324 | -1.99148 | -1.69543 |
| Cl | 2.444311 | 3.046557 | -0.46873 |
| B  | 2.698127 | -0.78443 | 2.36644  |
| F  | 2.161897 | -0.98283 | 3.643371 |
| F  | 1.938302 | -1.53171 | 1.400784 |
| F  | 2.580408 | 0.592439 | 2.007555 |
| F  | 4.038792 | -1.1848  | 2.316489 |
| Bi | 0.212032 | 0.147504 | -0.0973  |
| S  | -3.34276 | 0.896819 | 0.055968 |
| F  | -2.89488 | -1.90813 | 1.415838 |

|   |          |          |          |
|---|----------|----------|----------|
| F | -4.94314 | -1.50835 | 0.782447 |
| F | -3.6509  | -2.78479 | -0.43833 |
| O | -4.68065 | 1.534706 | 0.235988 |
| N | -3.21363 | -0.58814 | -0.47838 |
| C | -1.06415 | 1.510311 | -1.47102 |
| C | -2.41573 | 1.793673 | -1.2035  |
| C | -3.15951 | 2.738487 | -1.92729 |
| H | -4.21264 | 2.920231 | -1.6643  |
| C | -2.53308 | 3.4173   | -2.98531 |
| H | -3.09984 | 4.15803  | -3.5702  |
| C | -1.19017 | 3.144094 | -3.29115 |
| H | -0.69621 | 3.670578 | -4.12306 |
| C | -0.46023 | 2.209177 | -2.53054 |
| H | 0.600364 | 2.033988 | -2.76998 |
| C | -1.09204 | 0.661462 | 1.735429 |
| C | -2.43293 | 1.070151 | 1.616169 |
| C | -3.18231 | 1.521565 | 2.714237 |
| H | -4.23156 | 1.818636 | 2.566402 |
| C | -2.56855 | 1.568575 | 3.976443 |
| H | -3.14261 | 1.915523 | 4.849545 |
| C | -1.22901 | 1.172961 | 4.115779 |
| H | -0.7419  | 1.205911 | 5.103038 |
| C | -0.4861  | 0.736439 | 3.000215 |
| H | 0.567228 | 0.455726 | 3.135715 |
| C | -0.42087 | -1.88631 | -0.90121 |
| C | -0.24087 | -3.03652 | -0.11866 |
| H | 0.137047 | -2.96755 | 0.911269 |
| C | -0.54989 | -4.29086 | -0.67766 |
| H | -0.42914 | -5.20043 | -0.06735 |
| C | -1.00557 | -4.38331 | -2.00433 |
| H | -1.23915 | -5.36868 | -2.43816 |
| C | -1.16552 | -3.22024 | -2.7789  |
| H | -1.53023 | -3.28915 | -3.8165  |
| C | -0.87145 | -1.95953 | -2.22863 |
| H | -1.01443 | -1.0492  | -2.83219 |
| C | -3.66235 | -1.64941 | 0.301879 |

### IM4A

Energy = -2299.402171

|   |          |          |          |
|---|----------|----------|----------|
| S | 2.766059 | 0.412017 | -0.48236 |
| C | 0.29408  | 0.888154 | -1.68824 |
| C | 1.689661 | 0.896432 | -1.8398  |
| C | 2.288876 | 1.363713 | -3.01629 |
| H | 3.385886 | 1.370242 | -3.10497 |



|    |          |          |          |    |          |          |          |
|----|----------|----------|----------|----|----------|----------|----------|
| C  | 1.455171 | 1.84033  | -4.04449 | S  | -2.43886 | 0.272123 | 0.823413 |
| H  | 1.907374 | 2.222928 | -4.97196 | C  | -0.10869 | -1.02832 | 1.603549 |
| C  | 0.059806 | 1.849592 | -3.88591 | C  | -1.47089 | -0.81688 | 1.87397  |
| C  | -0.53821 | 1.365758 | -2.70242 | C  | -2.11544 | -1.38489 | 2.981088 |
| H  | -1.62994 | 1.382705 | -2.5733  | H  | -3.18486 | -1.19215 | 3.156857 |
| C  | 1.182218 | -1.75485 | 0.219378 | C  | -1.34744 | -2.17573 | 3.853104 |
| C  | 2.466442 | -1.35365 | -0.19057 | H  | -1.82479 | -2.63064 | 4.734246 |
| C  | 3.538387 | -2.25092 | -0.26927 | C  | 0.020891 | -2.37618 | 3.607244 |
| H  | 4.530755 | -1.89562 | -0.58596 | C  | 0.649336 | -1.80977 | 2.477845 |
| C  | 3.30708  | -3.5935  | 0.082951 | H  | 1.712927 | -1.99812 | 2.281675 |
| H  | 4.135957 | -4.3164  | 0.037542 | C  | -1.26943 | -0.5973  | -1.50546 |
| C  | 2.032329 | -4.00853 | 0.502228 | C  | -2.48093 | -0.50043 | -0.80514 |
| C  | 0.959823 | -3.09316 | 0.564821 | C  | -3.69249 | -0.9337  | -1.35944 |
| H  | -0.03568 | -3.43164 | 0.892608 | H  | -4.62822 | -0.83589 | -0.78859 |
| C  | -2.40037 | -1.45527 | -0.11148 | C  | -3.66305 | -1.47292 | -2.65812 |
| C  | -3.57166 | -1.0036  | 0.505334 | H  | -4.60048 | -1.81324 | -3.12375 |
| H  | -3.60571 | -0.0544  | 1.061928 | C  | -2.45025 | -1.57611 | -3.36257 |
| C  | -4.72153 | -1.80453 | 0.366775 | C  | -1.23511 | -1.1491  | -2.78618 |
| H  | -5.6599  | -1.47701 | 0.841238 | H  | -0.27853 | -1.24093 | -3.32096 |
| C  | -4.67646 | -2.99986 | -0.37262 | C  | 1.858893 | 1.737134 | 0.058113 |
| H  | -5.58493 | -3.61365 | -0.47543 | C  | 1.778949 | 2.27488  | 1.345707 |
| C  | -3.48162 | -3.41635 | -0.98462 | H  | 1.109914 | 1.853327 | 2.111411 |
| H  | -3.44718 | -4.35014 | -1.5676  | C  | 2.579512 | 3.399057 | 1.622971 |
| C  | -2.31274 | -2.64077 | -0.85534 | H  | 2.540847 | 3.853572 | 2.625411 |
| H  | -1.37382 | -2.96544 | -1.33002 | C  | 3.41659  | 3.9354   | 0.627929 |
| O  | 4.191854 | 0.601362 | -0.85672 | H  | 4.037811 | 4.815687 | 0.855526 |
| F  | -1.70342 | 3.360884 | 1.269851 | C  | 3.471244 | 3.355906 | -0.6519  |
| H  | -0.58414 | 2.24203  | -4.68809 | H  | 4.132564 | 3.775001 | -1.42663 |
| H  | 1.86278  | -5.05778 | 0.789883 | C  | 2.686047 | 2.226791 | -0.95597 |
| C  | 2.547207 | 1.13403  | 1.998355 | H  | 2.724648 | 1.742547 | -1.94206 |
| F  | -3.53236 | 3.408984 | -0.14405 | O  | -3.81823 | 0.451969 | 1.339312 |
| B  | -2.74886 | 2.643767 | 0.713423 | F  | 2.619834 | -1.47035 | 0.200938 |
| F  | -3.5227  | 1.992019 | 1.681466 | H  | 0.619057 | -2.99168 | 4.297008 |
| F  | -2.14627 | 1.567933 | -0.14678 | H  | -2.44171 | -1.9991  | -4.37921 |
| F  | -0.59327 | 0.455812 | 2.016297 | C  | -1.76209 | 2.641837 | -0.01196 |
| Bi | -0.51945 | -0.24212 | 0.086413 | F  | 3.113359 | -3.1202  | -1.37813 |
| N  | 2.040368 | 1.210751 | 0.687371 | B  | 2.293532 | -2.82211 | -0.31568 |
| F  | 3.869007 | 1.47306  | 2.083743 | F  | 0.91857  | -2.69759 | -0.72486 |
| F  | 1.862297 | 1.982191 | 2.7847   | F  | 2.406587 | -3.72057 | 0.732283 |
| F  | 2.452477 | -0.11148 | 2.568304 | F  | 1.683255 | -0.41339 | -2.17597 |
|    |          |          |          | Bi | 0.636428 | -0.09876 | -0.36942 |
|    |          |          |          | F  | -0.79703 | 3.575946 | 0.129798 |
|    |          |          |          | F  | -2.92947 | 3.187316 | 0.424359 |
|    |          |          |          | F  | -1.92019 | 2.447074 | -1.36239 |

**IM4B**

Energy = -2299.4101457

|                        |          |          |          |                       |          |          |          |
|------------------------|----------|----------|----------|-----------------------|----------|----------|----------|
| N                      | -1.38444 | 1.48672  | 0.703917 | N                     | 1.313398 | -0.81666 | -1.40288 |
|                        |          |          |          | C                     | 0.967926 | -0.52317 | -2.74183 |
| <b>IM4C</b>            |          |          |          | F                     | 0.793778 | 0.809415 | -3.00453 |
| Energy = -2299.4183907 |          |          |          | F                     | 1.896291 | -0.96349 | -3.63008 |
| S                      | 2.601598 | -0.07745 | -0.76572 | F                     | -0.19927 | -1.13852 | -3.02847 |
| C                      | 1.44541  | -1.05918 | 1.528808 |                       |          |          |          |
| C                      | 2.652096 | -0.90108 | 0.827873 | <b>IM4D</b>           |          |          |          |
| C                      | 3.891849 | -1.3148  | 1.330529 | Energy = -2299.413225 |          |          |          |
| H                      | 4.813203 | -1.16349 | 0.747894 | Bi                    | -0.58069 | -0.11955 | -0.44938 |
| C                      | 3.902909 | -1.93117 | 2.595069 | S                     | 2.807006 | 0.303682 | 0.257372 |
| H                      | 4.857215 | -2.2804  | 3.017615 | C                     | 0.540108 | -0.90594 | 1.336606 |
| C                      | 2.70847  | -2.09657 | 3.318517 | C                     | 1.857545 | -0.48623 | 1.58372  |
| C                      | 1.475449 | -1.652   | 2.796072 | C                     | 2.51603  | -0.79595 | 2.781072 |
| H                      | 0.549467 | -1.76434 | 3.380912 | H                     | 3.552193 | -0.46023 | 2.937095 |
| C                      | 0.740428 | 1.795024 | 0.080111 | C                     | 1.823538 | -1.54426 | 3.749806 |
| C                      | 2.048405 | 1.606565 | -0.39615 | H                     | 2.324757 | -1.80073 | 4.695626 |
| C                      | 2.906159 | 2.692492 | -0.61428 | C                     | 0.504115 | -1.96553 | 3.514296 |
| H                      | 3.922902 | 2.523349 | -1.00014 | C                     | -0.15149 | -1.63468 | 2.310657 |
| C                      | 2.417792 | 3.983725 | -0.34439 | H                     | -1.19419 | -1.94733 | 2.140236 |
| H                      | 3.06844  | 4.854202 | -0.51829 | C                     | 0.623558 | 1.76446  | -0.81604 |
| C                      | 1.10973  | 4.167774 | 0.134563 | C                     | 1.921362 | 1.787487 | -0.27259 |
| C                      | 0.250639 | 3.069055 | 0.357724 | C                     | 2.659018 | 2.97903  | -0.2461  |
| H                      | -0.77669 | 3.213006 | 0.728356 | H                     | 3.67295  | 2.972069 | 0.182767 |
| C                      | -1.74307 | -1.75406 | -0.16258 | C                     | 2.092779 | 4.142666 | -0.79514 |
| C                      | -1.09925 | -2.94378 | -0.51298 | H                     | 2.667029 | 5.081308 | -0.78239 |
| H                      | -0.00359 | -3.04454 | -0.50351 | C                     | 0.811981 | 4.105509 | -1.3643  |
| C                      | -1.92386 | -4.01811 | -0.89978 | C                     | 0.057052 | 2.913964 | -1.36548 |
| H                      | -1.45777 | -4.97285 | -1.18996 | H                     | -0.96648 | 2.904096 | -1.76179 |
| C                      | -3.32183 | -3.86852 | -0.9171  | C                     | -2.62363 | -1.09001 | -0.45842 |
| H                      | -3.95638 | -4.71526 | -1.22192 | C                     | -2.86187 | -1.97627 | -1.51231 |
| C                      | -3.91625 | -2.64946 | -0.54844 | H                     | -2.12341 | -2.12368 | -2.31321 |
| H                      | -5.01143 | -2.53384 | -0.55822 | C                     | -4.08351 | -2.67802 | -1.49299 |
| C                      | -3.12221 | -1.55093 | -0.16048 | H                     | -4.3078  | -3.38209 | -2.30973 |
| H                      | -3.57554 | -0.59423 | 0.138865 | C                     | -4.99995 | -2.48109 | -0.44605 |
| O                      | 3.921814 | -0.05356 | -1.43974 | H                     | -5.95195 | -3.03434 | -0.44135 |
| F                      | -1.24775 | 0.348818 | 2.397982 | C                     | -4.71128 | -1.58117 | 0.594385 |
| H                      | 2.733512 | -2.5716  | 4.311614 | H                     | -5.42924 | -1.42373 | 1.414585 |
| H                      | 0.735592 | 5.183224 | 0.337595 | C                     | -3.50213 | -0.85786 | 0.602852 |
| F                      | -3.94731 | 2.793367 | -0.81073 | H                     | -3.28528 | -0.14156 | 1.405415 |
| B                      | -3.34736 | 2.148593 | 0.263667 | F                     | -1.45778 | 1.310992 | 1.39759  |
| F                      | -2.80126 | 3.057943 | 1.180517 | O                     | 4.13373  | 0.688176 | 0.811277 |
| F                      | -4.22188 | 1.257324 | 0.896968 | N                     | 2.63587  | -0.55532 | -1.05867 |
| F                      | -2.22629 | 1.347512 | -0.28566 | C                     | 3.059605 | -1.88794 | -1.10276 |
| Bi                     | -0.38696 | -0.11342 | 0.567819 | F                     | 3.035775 | -2.31797 | -2.38272 |

|   |          |          |          |
|---|----------|----------|----------|
| F | 4.332432 | -2.08733 | -0.63479 |
| F | 2.271516 | -2.75529 | -0.38504 |
| H | -0.02965 | -2.55506 | 4.275724 |
| H | 0.371563 | 5.014383 | -1.80209 |
| F | -0.02325 | -1.27512 | -2.09689 |
| B | -2.40962 | 2.334036 | 0.88912  |
| F | -2.59989 | 1.990072 | -0.48037 |
| F | -1.8243  | 3.578011 | 1.02195  |
| F | -3.58838 | 2.203627 | 1.605538 |

**IM4E**

Energy = -2299.4013121

|   |          |          |          |
|---|----------|----------|----------|
| S | -2.57114 | 0.959617 | 0.156018 |
| C | -0.16741 | 2.215599 | -0.4211  |
| C | -1.51142 | 2.395367 | -0.0532  |
| C | -2.07931 | 3.663103 | 0.120765 |
| H | -3.13552 | 3.761763 | 0.413593 |
| C | -1.26351 | 4.787227 | -0.10563 |
| H | -1.68761 | 5.795876 | 0.013296 |
| C | 0.078935 | 4.627746 | -0.48759 |
| C | 0.63714  | 3.3404   | -0.63759 |
| H | 1.69604  | 3.224695 | -0.91969 |
| C | -0.59582 | -0.55801 | 1.428069 |
| C | -1.86529 | 0.027172 | 1.548982 |
| C | -2.63539 | -0.1688  | 2.703152 |
| H | -3.63529 | 0.285623 | 2.773111 |
| C | -2.10604 | -0.96346 | 3.735884 |
| H | -2.70257 | -1.13783 | 4.644232 |
| C | -0.83378 | -1.54431 | 3.609003 |
| C | -0.0563  | -1.34073 | 2.449102 |
| H | 0.928615 | -1.81569 | 2.340225 |
| C | 2.870748 | 0.540307 | 0.015858 |
| C | 3.826598 | -0.03135 | -0.83065 |
| H | 3.541954 | -0.70667 | -1.65062 |
| C | 5.177655 | 0.280896 | -0.5892  |
| H | 5.954019 | -0.15354 | -1.23848 |
| C | 5.533282 | 1.132088 | 0.47252  |
| H | 6.594242 | 1.36435  | 0.654204 |
| C | 4.546133 | 1.685503 | 1.306182 |
| H | 4.825781 | 2.348657 | 2.139892 |
| C | 3.186164 | 1.393669 | 1.081846 |
| H | 2.409293 | 1.826229 | 1.732584 |
| O | -3.95689 | 1.36447  | 0.510942 |
| F | 0.889583 | -4.02629 | 1.032987 |

|    |          |          |          |
|----|----------|----------|----------|
| H  | 0.706926 | 5.513553 | -0.67027 |
| H  | -0.43221 | -2.17842 | 4.414435 |
| N  | -2.19196 | 0.160165 | -1.16576 |
| C  | -2.92138 | -1.0055  | -1.47741 |
| F  | -0.4109  | -2.86097 | -0.48403 |
| B  | 0.870746 | -3.34135 | -0.1813  |
| F  | 1.415158 | -4.08218 | -1.21791 |
| F  | 0.656235 | -0.55345 | -2.24872 |
| F  | 1.720446 | -2.12786 | 0.000375 |
| Bi | 0.692505 | 0.114874 | -0.31078 |
| F  | -2.28778 | -1.67708 | -2.45372 |
| F  | -3.10281 | -1.86434 | -0.42593 |
| F  | -4.17819 | -0.71991 | -1.93448 |

**TS3C**

Energy = -2299.3820467

|    |          |          |          |
|----|----------|----------|----------|
| Bi | 0.433896 | 0.107458 | -0.356   |
| S  | -2.59337 | -0.17231 | 0.809292 |
| C  | -1.13156 | -1.4429  | -1.08912 |
| C  | -2.3963  | -1.41771 | -0.48352 |
| C  | -3.47099 | -2.22447 | -0.87572 |
| H  | -4.44679 | -2.1547  | -0.37169 |
| C  | -3.24071 | -3.12592 | -1.93173 |
| H  | -4.05178 | -3.79341 | -2.26115 |
| C  | -1.9878  | -3.16882 | -2.57135 |
| C  | -0.93423 | -2.3237  | -2.16192 |
| H  | 0.035017 | -2.33684 | -2.68547 |
| C  | -1.17393 | 1.728104 | -0.62839 |
| C  | -2.4098  | 1.399101 | -0.05096 |
| C  | -3.52735 | 2.239656 | -0.13468 |
| H  | -4.48095 | 1.94967  | 0.332979 |
| C  | -3.37382 | 3.459787 | -0.81779 |
| H  | -4.22897 | 4.148726 | -0.89137 |
| C  | -2.13809 | 3.806332 | -1.39028 |
| C  | -1.02337 | 2.944931 | -1.29528 |
| H  | -0.05229 | 3.23017  | -1.72443 |
| C  | 2.597256 | -1.0901  | -0.5093  |
| C  | 3.740805 | -0.3394  | -0.33217 |
| H  | 3.778403 | 0.752281 | -0.44605 |
| C  | 4.873105 | -1.09521 | 0.051826 |
| H  | 5.816501 | -0.55548 | 0.232137 |
| C  | 4.796536 | -2.4908  | 0.198266 |
| H  | 5.693505 | -3.05911 | 0.487921 |
| C  | 3.586783 | -3.16735 | -0.02908 |

|   |          |          |          |    |          |          |          |
|---|----------|----------|----------|----|----------|----------|----------|
| H | 3.515252 | -4.26064 | 0.086418 | C  | 4.362195 | 2.955247 | 0.908768 |
| C | 2.425327 | -2.45827 | -0.41653 | H  | 5.119819 | 3.687012 | 1.228232 |
| H | 1.468467 | -2.96822 | -0.59973 | C  | 3.266646 | 3.376966 | 0.136683 |
| F | 1.529609 | -0.36051 | -2.23115 | H  | 3.152104 | 4.433402 | -0.15402 |
| O | -3.89287 | -0.29637 | 1.512682 | C  | 2.294928 | 2.450658 | -0.30174 |
| N | -1.18242 | -0.16614 | 1.623355 | H  | 1.443262 | 2.765017 | -0.91982 |
| C | -0.92801 | -1.21488 | 2.532415 | O  | -3.92861 | 1.213301 | 0.840651 |
| F | -1.69246 | -1.14041 | 3.648518 | F  | 2.218917 | -2.1904  | 0.705683 |
| F | -1.12507 | -2.47537 | 2.023134 | H  | -2.05464 | -4.76885 | 1.987729 |
| F | 0.368641 | -1.1445  | 2.909103 | H  | -1.33168 | 0.918823 | -5.00273 |
| H | -1.82815 | -3.86917 | -3.4065  | C  | -1.04672 | 2.638479 | 1.259538 |
| H | -2.02772 | 4.768225 | -1.91491 | F  | 3.161871 | -3.08983 | -1.22099 |
| F | 1.508934 | 1.846786 | 1.422141 | B  | 2.039545 | -3.07752 | -0.42824 |
| B | 2.170301 | 2.759526 | 0.531386 | F  | 0.906145 | -2.49785 | -1.15167 |
| F | 3.539407 | 2.766846 | 0.784262 | F  | 1.67881  | -4.33796 | 0.032675 |
| F | 1.600026 | 4.019395 | 0.613356 | F  | 2.091701 | -0.07447 | -1.62073 |
| F | 1.95483  | 2.222466 | -0.80813 | Bi | 0.516081 | -0.28314 | -0.03021 |

### TS3B

Energy = -2299.37770787

|   |          |          |          |
|---|----------|----------|----------|
| S | -2.58569 | 0.671602 | 0.519658 |
| C | -1.15662 | -1.67258 | 0.878815 |
| C | -2.4108  | -1.05593 | 0.975656 |
| C | -3.55805 | -1.73573 | 1.409918 |
| H | -4.52558 | -1.21368 | 1.466984 |
| C | -3.41431 | -3.08416 | 1.778236 |
| H | -4.29194 | -3.64533 | 2.133539 |
| C | -2.15917 | -3.71139 | 1.698188 |
| C | -1.01879 | -3.01208 | 1.245463 |
| H | -0.05224 | -3.53168 | 1.173959 |
| C | -0.94799 | 0.420503 | -1.6436  |
| C | -2.25552 | 0.743064 | -1.25342 |
| C | -3.2554  | 1.116617 | -2.15933 |
| H | -4.26899 | 1.364928 | -1.80999 |
| C | -2.90084 | 1.175361 | -3.52019 |
| H | -3.65596 | 1.476183 | -4.26251 |
| C | -1.59248 | 0.862161 | -3.9342  |
| C | -0.60792 | 0.480101 | -2.9984  |
| H | 0.423003 | 0.237927 | -3.30547 |
| C | 2.486242 | 1.145924 | 0.126062 |
| C | 3.554378 | 0.642355 | 0.851402 |
| H | 3.652922 | -0.42286 | 1.100349 |
| C | 4.506184 | 1.602028 | 1.261144 |
| H | 5.366322 | 1.262787 | 1.860264 |

|    |          |          |          |
|----|----------|----------|----------|
| C  | 4.362195 | 2.955247 | 0.908768 |
| H  | 5.119819 | 3.687012 | 1.228232 |
| C  | 3.266646 | 3.376966 | 0.136683 |
| H  | 3.152104 | 4.433402 | -0.15402 |
| C  | 2.294928 | 2.450658 | -0.30174 |
| H  | 1.443262 | 2.765017 | -0.91982 |
| O  | -3.92861 | 1.213301 | 0.840651 |
| F  | 2.218917 | -2.1904  | 0.705683 |
| H  | -2.05464 | -4.76885 | 1.987729 |
| H  | -1.33168 | 0.918823 | -5.00273 |
| C  | -1.04672 | 2.638479 | 1.259538 |
| F  | 3.161871 | -3.08983 | -1.22099 |
| B  | 2.039545 | -3.07752 | -0.42824 |
| F  | 0.906145 | -2.49785 | -1.15167 |
| F  | 1.67881  | -4.33796 | 0.032675 |
| F  | 2.091701 | -0.07447 | -1.62073 |
| Bi | 0.516081 | -0.28314 | -0.03021 |
| F  | 0.114864 | 2.899918 | 1.897718 |
| F  | -2.03578 | 3.299561 | 1.913641 |
| F  | -0.96098 | 3.229465 | 0.019332 |
| N  | -1.23779 | 1.242957 | 1.231106 |

### TS3D

Energy = -2299.3781235

|    |          |          |          |
|----|----------|----------|----------|
| F  | -0.89395 | 1.421888 | -1.83566 |
| B  | -2.28211 | -2.62416 | 0.575897 |
| F  | -1.93847 | -2.29706 | -0.78568 |
| F  | -1.80378 | -3.87699 | 0.901309 |
| F  | -1.55957 | -1.61772 | 1.38644  |
| F  | -3.63697 | -2.46975 | 0.78223  |
| Bi | -0.50193 | -0.03554 | -0.18571 |
| S  | 2.725938 | 0.747594 | 0.32856  |
| F  | 1.771678 | 0.333617 | -2.78795 |
| F  | 1.637005 | 2.511609 | -2.75604 |
| F  | 3.532234 | 1.525544 | -2.29772 |
| O  | 4.153811 | 1.096059 | 0.539356 |
| N  | 1.790217 | 1.473174 | -0.75929 |
| C  | 1.300319 | -1.51889 | -0.35217 |
| C  | 2.561652 | -1.02635 | 0.008649 |
| C  | 3.689203 | -1.85535 | 0.08706  |
| H  | 4.665081 | -1.43105 | 0.368994 |
| C  | 3.526149 | -3.21879 | -0.21562 |
| H  | 4.395704 | -3.8923  | -0.17161 |
| C  | 2.263753 | -3.72086 | -0.57458 |

|   |          |          |          |   |          |          |          |
|---|----------|----------|----------|---|----------|----------|----------|
| H | 2.143487 | -4.79011 | -0.80932 | H | -4.06604 | 4.456523 | 0.621948 |
| C | 1.134715 | -2.87515 | -0.63958 | C | -1.90827 | 4.168483 | 0.729329 |
| H | 0.148135 | -3.27873 | -0.90844 | C | -0.83197 | 3.257067 | 0.69938  |
| C | 0.359054 | 0.888762 | 1.737495 | H | 0.201751 | 3.618425 | 0.803226 |
| C | 1.747666 | 1.072387 | 1.800245 | C | 2.722002 | -2.14408 | -0.77842 |
| C | 2.419252 | 1.482983 | 2.958612 | C | 3.571948 | -1.07208 | -0.47006 |
| H | 3.512657 | 1.608599 | 2.956155 | H | 4.024616 | -0.47917 | -1.27683 |
| C | 1.642795 | 1.737005 | 4.103658 | C | 3.81845  | -0.77849 | 0.884158 |
| H | 2.135627 | 2.0735   | 5.028551 | H | 4.472207 | 0.06918  | 1.135338 |
| C | 0.248335 | 1.561945 | 4.069551 | C | 3.218196 | -1.54464 | 1.900147 |
| H | -0.34893 | 1.758014 | 4.973831 | H | 3.412788 | -1.30733 | 2.95698  |
| C | -0.39829 | 1.129367 | 2.892534 | C | 2.355658 | -2.60508 | 1.563005 |
| H | -1.48852 | 0.974524 | 2.890023 | H | 1.869422 | -3.19697 | 2.352393 |
| C | -2.62384 | 1.057689 | -0.6821  | C | 2.093692 | -2.91135 | 0.214189 |
| C | -3.60155 | 0.288891 | -1.29553 | H | 1.414585 | -3.72618 | -0.07528 |
| H | -3.38015 | -0.63724 | -1.84152 | F | 2.489234 | -2.44091 | -2.07854 |
| C | -4.92708 | 0.738897 | -1.11006 | O | -4.16169 | -0.63192 | 0.185839 |
| H | -5.74614 | 0.144587 | -1.54539 | N | -1.65127 | -0.86538 | 1.206239 |
| C | -5.19658 | 1.908687 | -0.37899 | C | -1.6869  | -2.25327 | 1.45949  |
| H | -6.23625 | 2.248113 | -0.25481 | F | -2.88486 | -2.67175 | 1.934681 |
| C | -4.14642 | 2.654621 | 0.183778 | F | -1.41563 | -3.04197 | 0.369629 |
| H | -4.34867 | 3.580077 | 0.746158 | F | -0.74845 | -2.53883 | 2.392361 |
| C | -2.80616 | 2.245193 | 0.015645 | H | -0.26791 | -1.15598 | -4.88448 |
| H | -1.97    | 2.832208 | 0.422587 | H | -1.70045 | 5.241864 | 0.862958 |
| C | 2.18002  | 1.458565 | -2.1153  | F | 2.235331 | 2.255273 | 0.988938 |

### IM5

Energy = -2299.476826

|    |          |          |          |
|----|----------|----------|----------|
| Bi | 0.46988  | 0.186874 | 0.424385 |
| S  | -2.72957 | -0.25564 | 0.120752 |
| C  | -0.60241 | -0.42005 | -1.55384 |
| C  | -1.99084 | -0.60215 | -1.48757 |
| C  | -2.79855 | -0.96602 | -2.57204 |
| H  | -3.88583 | -1.08953 | -2.45396 |
| C  | -2.15272 | -1.17565 | -3.8034  |
| H  | -2.74233 | -1.47818 | -4.68242 |
| C  | -0.76116 | -0.99636 | -3.91261 |
| C  | 0.015656 | -0.61461 | -2.79884 |
| H  | 1.100562 | -0.47496 | -2.91102 |
| C  | -1.08819 | 1.888215 | 0.524939 |
| C  | -2.42638 | 1.491291 | 0.39486  |
| C  | -3.52034 | 2.36498  | 0.413558 |
| H  | -4.54932 | 1.98986  | 0.303388 |
| C  | -3.23841 | 3.731411 | 0.59083  |

|   |          |          |          |
|---|----------|----------|----------|
| H | -4.06604 | 4.456523 | 0.621948 |
| C | -1.90827 | 4.168483 | 0.729329 |
| C | -0.83197 | 3.257067 | 0.69938  |
| H | 0.201751 | 3.618425 | 0.803226 |
| C | 2.722002 | -2.14408 | -0.77842 |
| C | 3.571948 | -1.07208 | -0.47006 |
| H | 4.024616 | -0.47917 | -1.27683 |
| C | 3.81845  | -0.77849 | 0.884158 |
| H | 4.472207 | 0.06918  | 1.135338 |
| C | 3.218196 | -1.54464 | 1.900147 |
| H | 3.412788 | -1.30733 | 2.95698  |
| C | 2.355658 | -2.60508 | 1.563005 |
| H | 1.869422 | -3.19697 | 2.352393 |
| C | 2.093692 | -2.91135 | 0.214189 |
| H | 1.414585 | -3.72618 | -0.07528 |
| F | 2.489234 | -2.44091 | -2.07854 |
| O | -4.16169 | -0.63192 | 0.185839 |
| N | -1.65127 | -0.86538 | 1.206239 |
| C | -1.6869  | -2.25327 | 1.45949  |
| F | -2.88486 | -2.67175 | 1.934681 |
| F | -1.41563 | -3.04197 | 0.369629 |
| F | -0.74845 | -2.53883 | 2.392361 |
| H | -0.26791 | -1.15598 | -4.88448 |
| H | -1.70045 | 5.241864 | 0.862958 |
| F | 2.235331 | 2.255273 | 0.988938 |
| B | 2.595215 | 2.499646 | -0.37106 |
| F | 3.928352 | 2.204204 | -0.59621 |
| F | 2.245722 | 3.782404 | -0.74976 |
| F | 1.764586 | 1.542817 | -1.14621 |

### 7

Energy = -1967.8245672

|    |          |          |          |
|----|----------|----------|----------|
| Bi | -0.63383 | -0.69187 | -0.59404 |
| S  | 2.077308 | 0.94155  | 0.063046 |
| C  | 0.502902 | -0.78825 | 1.436355 |
| C  | 1.678733 | -0.03049 | 1.530742 |
| C  | 2.480841 | 0.052582 | 2.675273 |
| H  | 3.390972 | 0.671308 | 2.687875 |
| C  | 2.073555 | -0.69756 | 3.792861 |
| H  | 2.679653 | -0.67731 | 4.711508 |
| C  | 0.896374 | -1.467   | 3.739607 |
| C  | 0.106262 | -1.51176 | 2.571845 |
| H  | -0.82026 | -2.10633 | 2.558382 |
| C  | -0.54492 | 1.593005 | -0.32594 |

|   |          |          |          |                       |          |           |           |
|---|----------|----------|----------|-----------------------|----------|-----------|-----------|
| C | 0.730313 | 2.118406 | -0.07048 | F                     | -4.63997 | -1.49615  | 0.171785  |
| C | 0.999171 | 3.476637 | 0.136036 | F                     | -4.26927 | 0.702861  | 0.786156  |
| H | 2.022756 | 3.829936 | 0.333768 | F                     | -2.53632 | -0.84413  | 0.920916  |
| C | -0.09401 | 4.359028 | 0.065714 |                       |          |           |           |
| H | 0.069737 | 5.437489 | 0.212979 | <b>3</b>              |          |           |           |
| C | -1.38652 | 3.868092 | -0.19301 | Energy = -331.6361266 |          |           |           |
| C | -1.62015 | 2.491156 | -0.3924  | C                     | -1.14298 | -1.21726  | 0.000006  |
| H | -2.63748 | 2.122558 | -0.58884 | C                     | 0.262969 | -1.22676  | 0.000000  |
| O | 3.421394 | 1.561336 | 0.128274 | C                     | 0.940817 | -0.000011 | -0.000029 |
| N | 1.668506 | -0.03687 | -1.19569 | C                     | 0.262969 | 1.226748  | -0.000009 |
| C | 2.585553 | -1.04259 | -1.57582 | C                     | -1.14296 | 1.217275  | 0.000015  |
| F | 3.696811 | -0.53958 | -2.16318 | C                     | -1.84851 | 0.000002  | -0.000007 |
| F | 3.023163 | -1.83444 | -0.54832 | H                     | -1.68923 | -2.17381  | 0.000015  |
| F | 1.971866 | -1.85383 | -2.46973 | H                     | 0.838043 | -2.16501  | 0.000001  |
| H | 0.583801 | -2.04254 | 4.625234 | H                     | 0.838096 | 2.164964  | -0.000009 |
| H | -2.23461 | 4.569122 | -0.24112 | H                     | -1.68924 | 2.173807  | 0.000025  |
| F | -3.28749 | -0.13951 | -1.1332  | H                     | -2.94946 | 0.000023  | -0.00001  |
| B | -3.76235 | -0.43223 | 0.183131 | F                     | 2.295326 | 0.000005  | 0.000014  |
